# Supplementary material for: Aqueous synthesis of sulfonate-functionalized 1,2,4-triazole ligands and their 2D Cd2+ coordination networks: crystal structure and photoluminescent properties
Source: Royal Society of Chemistry journal article supplement (doi:10.1039/c3dt33066d), 2013-01-01
Supplement: c3dt33066d.pdf [file c3dt33066d.pdf]

# Aqueous synthesis of sulfonate-functionalized 1,2,4-triazole ligands and their 2D Cd<sup>2+</sup> coordination networks: Crystal structure and photoluminescent properties

Verónica Gómez,<sup>a</sup> Vanesa Lillo,<sup>a</sup> Eduardo C. Escudero-Adán, Eddy Martín,<sup>a</sup> and José Ramón Galán-Mascarós<sup>\*,a,b</sup>

## Supporting Information

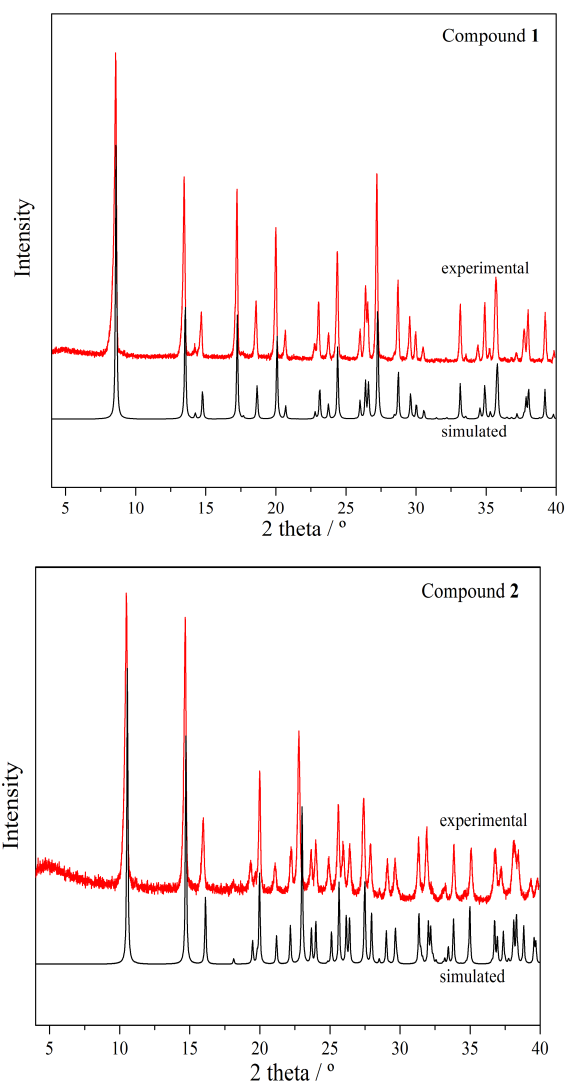

**Fig. S1.** Simulated (black) and experimental (red) PXRD patterns for compounds **1** (top) and **2** (bottom).

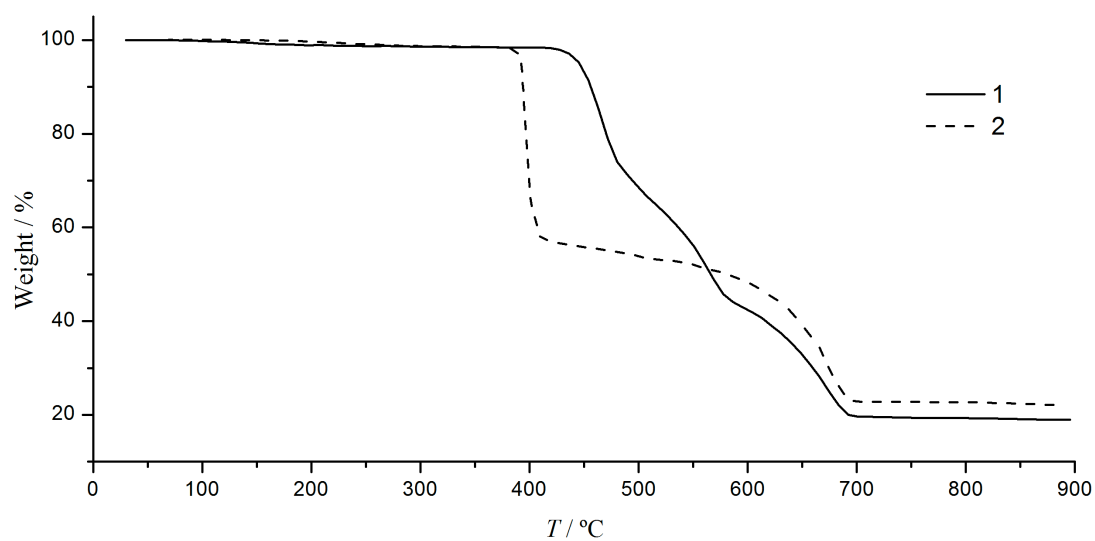

**Fig. S2** TGA plots for compounds **1** (solid line) and **2** (dashed line).
